# Supplementary material
Source: ML conference proceedings conference paper supplement (https://openaccess.thecvf.com/content/CVPR_2020/html/Perera_Generative-Discriminative_Feature_Representations_CVPR_2020_paper.html)
Supplement: Supplementary file 1 [file Perera_Generative-Discriminative_Feature_Representations_CVPR_2020_supplemental.pdf]

# Generative-discriminative Feature Representations for Open-set Recognition

Pramuditha Perera\*  
Johns Hopkins University  
pperera3@jhu.edu

Vlad I. Morariu  
Adobe Research  
morariu@adobe.com

Rajiv Jain  
Adobe Research  
rajijain@adobe.com

Varun Manjunatha  
Adobe Research  
vmanjuna@adobe.com

Curtis Wigington  
Adobe Research  
wigingto@adobe.com

Vicente Ordonez  
University of Virginia  
vicente@virginia.edu

Vishal M. Patel  
Johns Hopkins University  
vpatel136@jhu.edu

| $\alpha_1$ | $\alpha_2$ | Accuracy | AUC   |
|------------|------------|----------|-------|
| 0.2        | 0.8        | 90.77    | 88.76 |
| 0.4        | 0.6        | 91.90    | 88.44 |
| 0.5        | 0.5        | 91.75    | 87.35 |
| 0.6        | 0.4        | 92.53    | 89.09 |
| 0.8        | 0.2        | 92.72    | 89.85 |

Table 1. Sensitivity of the algorithm to different hyper-parameters.

## 1. Impact of hyper-parameters

The proposed method optimizes a deep network with the objective of minimizing the loss  $l_t = \alpha_1 l_c + \alpha_2 l_{ss}$ . We carried out a study investigating performance of the proposed method for different values of  $\alpha_1$  and  $\alpha_2$ . For this study, we used animal classes of CIFAR10 as known classes and considered remaining classes as open-set classes. It should be noted that this known-openset class split is different from all splits considered in the CIFAR10 experiment in the main paper. Parameters  $\alpha_1$  and  $\alpha_2$  were changed into different combinations between 0.2 – 0.8 and performance of the system was analyzed. Seed was fixed in all these experiments to make sure comparisons are fair. In Table 1, closed-set classification accuracy and open-set detection performance (in AUC of ROC curve) are tabulated.

According to Table 1, AUC doesn't vary a lot for different combinations of  $\alpha_1$  and  $\alpha_2$ . However, the highest performance is obtained when  $\alpha_1 = 0.8$  and  $\alpha_2 = 0.2$ . General trend in Table 1 suggests that a better performance is obtained when a lower weight is assigned to the self-supervision loss. On the other hand, as shown in the ablation study of the main paper, removing self-supervision loss reduces open-set recognition performance. Based on these observations, we set hyper-parameters  $\alpha_1 = 0.8$  and  $\alpha_2 = 0.2$  for all experiments.

---

\*This work was completed while the author was working as an intern at Adobe Research.
